# Supplementary material
Source: publisher site journal article supplement (https://www.dovepress.com/get_supplementary_file.php?f=152221a.xlsx)
Supplement: Supplementary file 1 [file get_supplementary_file.php]

## Sheet: Foglio1
PT Number	age	gender	dis durat	scid 1	scid2	FAB	MoCA	MDS UPDRS-III bsl	MDS UPDRS-III FU	NMS bsl	NMS FU	PDQ 8 bsl	PDQ 8 FU	Apathy bls	Apathy FU	HAM A bls	HAM A FU	HAM D bls	HAM D FU	CGI bsl	CGI FU	BPRS bsl	BPRS FU
Nonne Pietro	54	M	8	depressive disorders	0	18	27	18	23	8	12	6	9	12	11	28	26	28	28	3	3	40	38
Pernazza Carla	64	F	4	pathological gambling	0	18	30	20	19	69	70	8	12	8	16	2	2	4	4	0	0	24	24
PellegrinoNicola	65	M	4	anxiety disorders	0	18	29	12	drop out	13		4		14		30		18		3		38	30
Giuli Sandro	64	M	3	adjustment disorders	0	18	30	19	22	23	22	6	6	10	10	26	26	28	18	3	3	32	38
Galderisi Natale	63	M	7	anxiety disorders	0	18	28	23	23	7	7	6	6	6	7	32	24	20	26	4	3	36	32
Pochesci Franca	52	F	4	depressive disorders	0	17	28	20	22	24	30	12	12	18	15	24	32	24	20	4	4	36	34
Sturiale Eugenio	54	M	5	depressive disorders	0	17	28	23	25	16	23	10	15	20	22	26	20	26	24	4	4	30	36
Cacciatore M Antonietta	56	F	8	adjustment disorders	0	17	29	14	5	4	5	12	9	16	16	18	26	18	26	3	4	32	30
Tomasetti Fabio	50	M	3	adjustment disorders	0	18	30	13	19	7	7	8	9	12	12	24	18	22	18	4	3	32	32
Maso Daniela	57	F	5	anxiety disorders	0	18	30	16	18	10	15	14	15	16	23	20	24	18	22	3	4	30	30
